# Supplementary material
Source: ML conference proceedings conference paper supplement (https://openaccess.thecvf.com/content/ICCV2025/html/Yu_EvaGaussians_Event_Stream_ICCV_2025_paper.html)
Supplement: Supplementary file 1 [file Supplementary_1159.pdf › supplementary/Supplementary_1159.pdf]

# EvaGaussians: Event Stream Assisted Gaussian Splatting from Blurry Images

## Supplementary Material

|     |                                                                       |          |     |
|-----|-----------------------------------------------------------------------|----------|-----|
| 001 | <b>Contents</b>                                                       |          |     |
| 002 | <b>A Dataset Details</b>                                              | <b>1</b> |     |
| 003 | A.1. EvaGaussians-Blender Dataset . . . . .                           | 1        |     |
| 004 | A.1.1. Dataset Overview . . . . .                                     | 1        |     |
| 005 | A.1.2. Camera Settings . . . . .                                      | 1        |     |
| 006 | A.2. EvaGaussians-DAVIS Dataset . . . . .                             | 2        |     |
| 007 | A.2.1. Camera Calibration . . . . .                                   | 2        |     |
| 008 | A.2.2. Camera Settings . . . . .                                      | 4        |     |
| 009 | A.3. Comparison with Existing Datasets . . . . .                      | 5        |     |
| 010 | <b>B Additional Ablations</b>                                         | <b>5</b> |     |
| 011 | B.1. Analysis on EDI Pre-processing . . . . .                         | 5        |     |
| 012 | B.2. Robustness to Different Datasets. . . . .                        | 6        |     |
| 013 | B.3. Robustness of Pose Optimization . . . . .                        | 6        |     |
| 014 | <b>C Detailed Comparisons</b>                                         | <b>6</b> |     |
| 015 | C.1. Synthetic Data Comparison . . . . .                              | 6        |     |
| 016 | C.2. Real-world Data Comparison . . . . .                             | 6        |     |
| 017 | <b>D Broader Impacts</b>                                              | <b>7</b> |     |
| 018 | Please check our supplementary <b>project page</b> for video          |          |     |
| 019 | results.                                                              |          |     |
| 020 | <b>A. Dataset Details</b>                                             |          |     |
| 021 | <b>A.1. EvaGaussians-Blender Dataset</b>                              |          |     |
| 022 | <b>A.1.1. Dataset Overview</b>                                        |          |     |
| 023 | We use Blender [3] to craft nine indoor and outdoor 3D                |          |     |
| 024 | scenes, and further incorporate four 3D scenes from De-               |          |     |
| 025 | blurNeRF [7] and six 3D objects from the NeRF-Synthetic               |          |     |
| 026 | dataset [8] as our base scenes. We then design various cam-           |          |     |
| 027 | era trajectories to simulate motion-blurred images on these           |          |     |
| 028 | base scenes, and generate the corresponding event streams             |          |     |
| 029 | using V2E [6]. Visualization of our crafted scenes are                |          |     |
| 030 | shown in Figure. 1 and Figure. 3, and an overview of the              |          |     |
| 031 | design purposes of these crafted scenes is provided below:            |          |     |
| 032 | <b>Indoor Scenes</b>                                                  |          |     |
| 033 | • <i>Classroom</i> : A typical classroom setting featuring desks,     |          |     |
| 034 | chairs, a blackboard, and educational posters. This scene             |          |     |
| 035 | is designed to simulate an academic environment, ideal                |          |     |
| 036 | for educational and surveillance applications.                        |          |     |
| 037 | • <i>Café</i> : A cozy café with tables, chairs, a counter, and var-  |          |     |
| 038 | ious decorations. This scene mimics a social setting, pro-            |          |     |
| 039 | viding a dynamic backdrop for testing social interaction              |          |     |
| 040 | algorithms and retail analytics.                                      |          |     |
|     | • <i>Dormitory</i> : A student dormitory room equipped with           |          | 041 |
|     | beds, study desks, personal belongings, and typical dorm              |          | 042 |
|     | furniture. This scene represents a personal living space,             |          | 043 |
|     | useful for smart home and security applications.                      |          | 044 |
|     | <b>Outdoor Scenes</b>                                                 |          | 045 |
|     | • <i>Desert</i> : A vast, arid landscape with sand dunes and sparse   |          | 046 |
|     | vegetation. This scene is perfect for testing navigation              |          | 047 |
|     | and object detection in harsh, unstructured environments.             |          | 048 |
|     | • <i>City Blocks</i> : Urban scenes featuring streets, buildings, ve- |          | 049 |
|     | hicles, and pedestrians. This environment is essential for            |          | 050 |
|     | autonomous driving, urban planning, and smart city ap-                |          | 051 |
|     | plications.                                                           |          | 052 |
|     | • <i>Lake</i> : A serene natural setting with dense forests sur-      |          | 053 |
|     | rounding a tranquil lake. This scene provides a complex               |          | 054 |
|     | environment for testing outdoor navigation, environmen-               |          | 055 |
|     | tal monitoring, and wildlife tracking.                                |          | 056 |
|     | • <i>Forests</i> : A rugged terrain with forested areas and scat-     |          | 057 |
|     | tered boulders. This scene is useful for off-road naviga-             |          | 058 |
|     | tion and geological survey applications.                              |          | 059 |
|     | • <i>Venice</i> : A picturesque representation of Venice with         |          | 060 |
|     | canals, bridges, and historic architecture. This scene of-            |          | 061 |
|     | fers a unique setting for cultural heritage preservation,             |          | 062 |
|     | tourism, and urban analytics.                                         |          | 063 |
|     | • <i>London</i> : A bustling cityscape of London with iconic land-    |          | 064 |
|     | marks, streets, and a dynamic urban environment. This                 |          | 065 |
|     | scene supports applications in tourism, traffic manage-               |          | 066 |
|     | ment, and city modeling.                                              |          | 067 |
|     | <b>A.1.2. Camera Settings</b>                                         |          | 068 |
|     | To render the base scenes and simulate motion blur, we con-           |          | 069 |
|     | figure the virtual camera in Blender with a resolution of             |          | 070 |
|     | 400 × 600, and set the scaling factor to 1.0. The virtual             |          | 071 |
|     | camera utilized a perspective model with a shutter speed              |          | 072 |
|     | of 1/180 seconds. Subsequently, we developed a dedicated              |          | 073 |
|     | script to generate camera trajectory and motion blur. An ex-          |          | 074 |
|     | ample is shown in Figure. 4. Along each predefined virtual            |          | 075 |
|     | camera trajectory, we uniformly sampled 35 camera poses,              |          | 076 |
|     | adding a certain level of jitter to create the training set. We       |          | 077 |
|     | recorded the start and end time of the camera exposure time,          |          | 078 |
|     | the positions, and 20 intermediate frames during the expo-            |          | 079 |
|     | sure time (obtained through linear interpolation between the          |          | 080 |
|     | start and end positions). We then uniformly sample 100                |          | 081 |
|     | camera poses along the same trajectory to form the test set.          |          | 082 |
|     | Using the event camera simulator from V2E [6], we simu-               |          | 083 |
|     | late the event stream for each camera trajectory and synthe-          |          | 084 |
|     | size the event bins from the event stream at the start and end        |          | 085 |
|     | of the exposure time.                                                 |          | 086 |

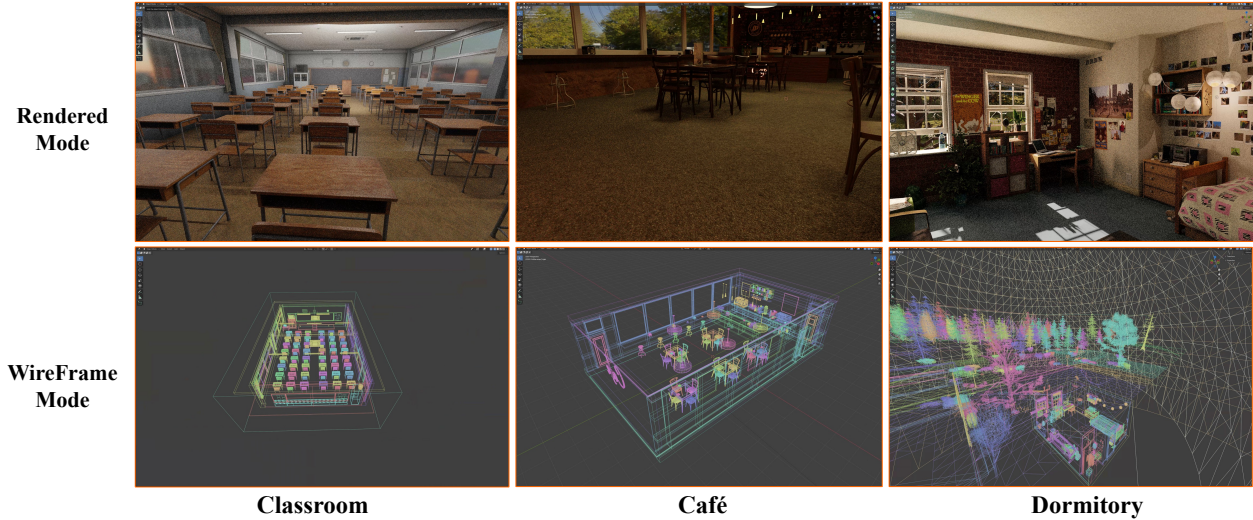

Figure 1. **Visualization of EvaGaussians-Blender Indoor Scenes.** The sizes of the *Café* and *Classroom* scenes are approximately  $15 \times 7 \times 4$  meters, while the *Dormitory* scene is approximately  $5 \times 5 \times 4$  meters (with an additional outdoor garden, making the overall scene size  $20 \times 20 \times 6$  meters).

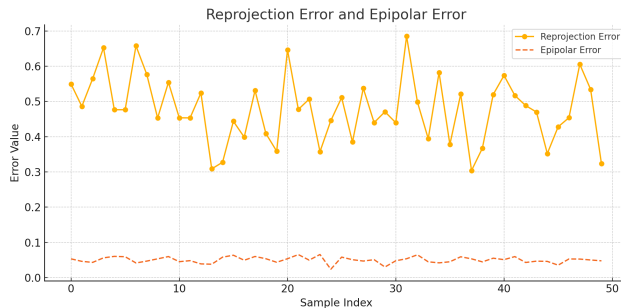

Figure 2. **Visualization of Reprojection Errors and Epipolar Errors.** The figure illustrates the 50 sets of reprojection errors and epipolar errors generated during the calibration process. The reprojection error  $e_r$  represents the average discrepancy between the observed points and the projected points, calculated as shown in Eq. 1. The epipolar error  $e_{\text{epipolar}}$  represents the average distance between points in one camera and the epipolar lines calculated from the other camera for each pair of images, calculated as shown in Eq. 2. As shown in the figure, the average reprojection error is approximately 0.5, and the average epipolar error is approximately 0.05, indicating a high level of accuracy in the calibration process.

## 087 A.2. EvaGaussians-DAVIS Dataset

088 We use the color DAVIS346 event camera [1] to record our  
089 real-world event and RGB sequences and utilize the default  
090 camera settings provided in the DV software that comes  
091 with the camera. We name the five captured scenes as *desk*  
092 & *chair*, *washroom*, *pokémon*, *pillow*, and *bag*.

Table 1. **Comparison with existing event-assisted deblurring reconstruction synthetic dataset.** The existing datasets suffer from limited data size and scene diversity, and none of them includes large-scale scene for evaluation.

| Dataset    | Scene  |        |       |       | Event     |              |
|------------|--------|--------|-------|-------|-----------|--------------|
|            | Object | Medium | Large | Total | Event Map | Event Stream |
| E2NeRF[10] | 7      | 0      | 0     | 7     | ✓         | ✗            |
| EvDNeRF[2] | 0      | 4      | 0     | 4     | ✗         | ✓            |
| Ours       | 6      | 7      | 6     | 19    | ✓         | ✓            |

Table 2. **Comparison with existing event-assisted deblurring reconstruction real-world dataset.** The scenes in E2NeRF and EvDNeRF are captured within a limited area and more focus on the objects with a specific background.

| Dataset    | Scene  |        |       | Camera Motion        |
|------------|--------|--------|-------|----------------------|
|            | Object | Medium | Total |                      |
| E2NeRF[10] | 5      | 0      | 5     | <i>Diverse</i>       |
| EvDNeRF[2] | 5      | 0      | 5     | <i>Naïve panning</i> |
| Ours       | 3      | 2      | 5     | <i>Diverse</i>       |

### A.2.1. Camera Calibration

We calibrated the event camera using the DV software provided by DAVIS. During the calibration process, we used a  $6 \times 9$  checkerboard pattern with a square size of 30 mm. In the software configuration, we set the width to 9, height to 6, and square size to 30 mm. We then ran the calibration module and moved the calibration pattern in front of the camera. The software detected the pattern and collected images, highlighting the detected area in green, as shown in Figure. 5. We set the minimum detections parameter to 50 to ensure a sufficient number of samples and used the con-

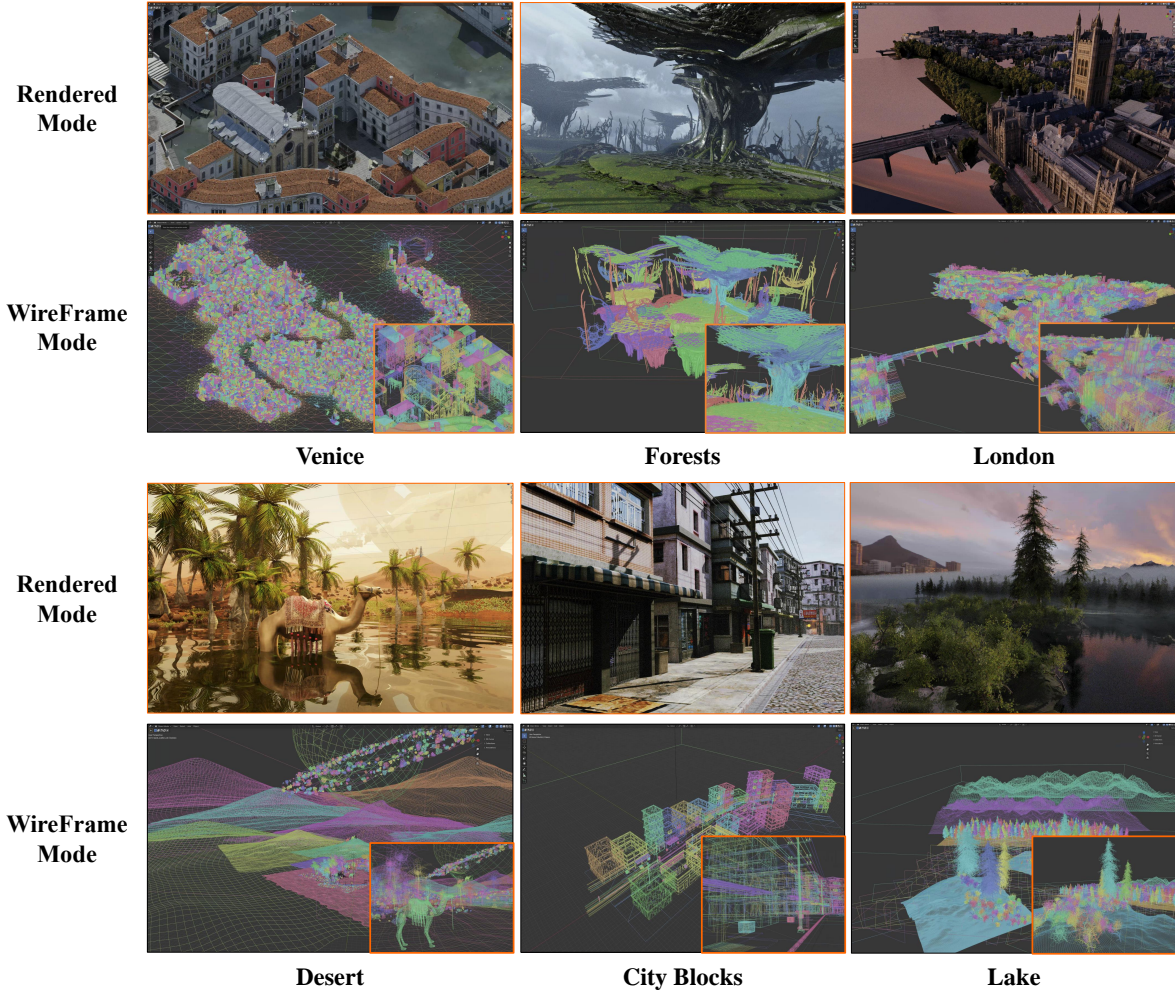

Figure 3. **Visualization of EvaGaussians-Blender Outdoor Scenes.** These scenes include rich details and diverse components like sky, lake, river, desert, forest, cities, roads. All scenes cover an area of more than 1 square kilometer.

secutive detections parameter to ensure consistent pattern detection. Additionally, we enabled the image verification option to check the collected images in real-time, discarding inaccurately detected images and replacing them with new ones. We evaluate the calibration accuracy using the reprojection error  $e_r$  as Eq. 1 and the epipolar error  $e_{\text{epipolar}}$  as Eq. 2 in stereo calibration. The reprojection error is calculated as follows:

$$e_r = \frac{1}{n} \sum_{i=1}^n \|x_i - \hat{x}_i\| \quad (1)$$

where  $x_i$  represents the observed points and  $\hat{x}_i$  represents the projected points. The epipolar error is calculated as the average epipolar error for each point in all collected images. For each pair of images, the error is calculated as the sum

of the distances between the points in one camera and the epipolar lines calculated from the other camera ( $m$  is the number of acquired images,  $n$  is the number of points). The formula is as follows:

$$e_{\text{epipolar}} = \frac{1}{m \times n} \sum_{i=1}^m \sum_{j=1}^n [d(P1_{i,j}, l_{2,i,j}) + d(P2_{i,j}, l_{1,i,j})] \quad (2)$$

where  $P1_{i,j}$  and  $P2_{i,j}$  are the projection points of the  $j$ th point in the  $i$ th image in two cameras, and  $l_{1,i,j}$  and  $l_{2,i,j}$  are the epipolar lines corresponding to the  $j$ th point in the  $i$ th image calculated from the other camera. The maximum allowable error can be set under *Max Reprojection Error*. The stereo calibration also calculates the error caused by the epipolar constraint, which can be set under *Max Epipolar Error*. Once the calibration is successful, the results are



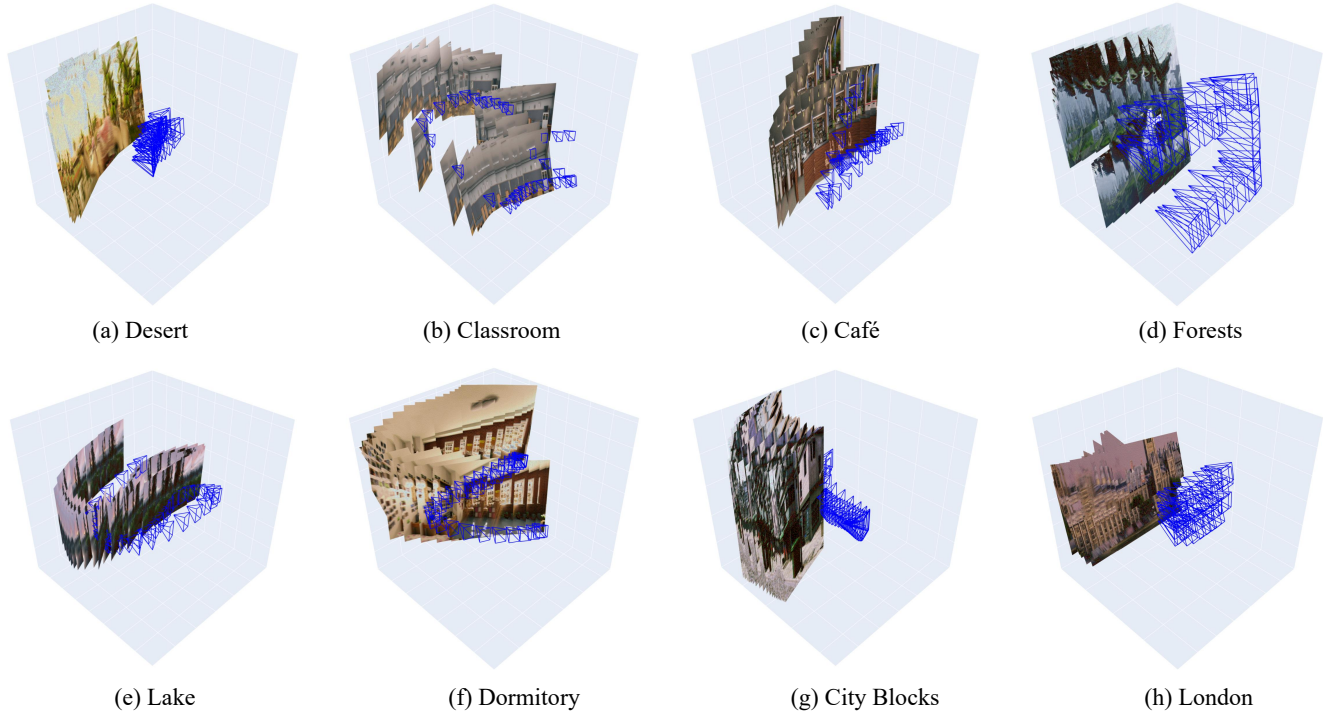

Figure 4. **Visualization of Camera Trajectory.** The trajectories depicted were manually configured within Blender [3] to ensure precise control over the camera paths. For the purpose of visualization, these trajectories have been normalized.

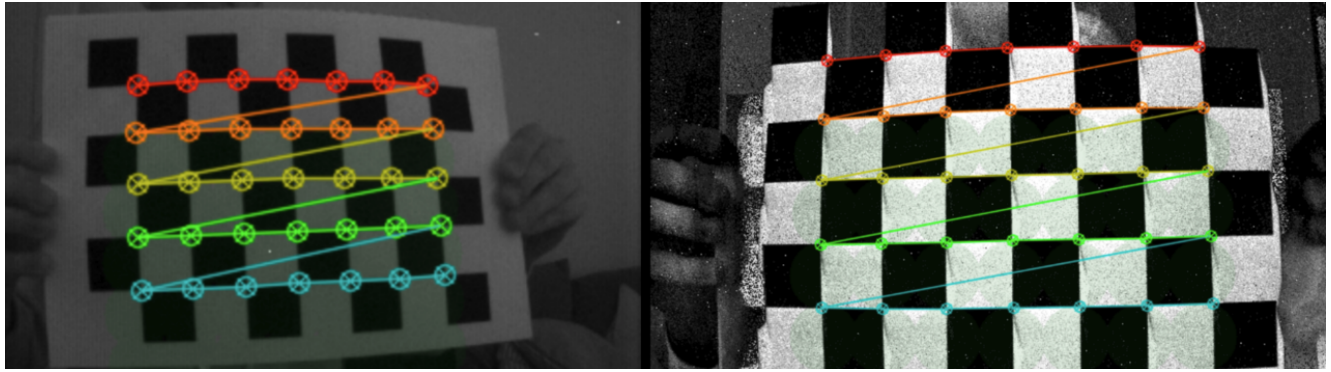

Figure 5. **Illustration of Camera Calibration.** The left panel shows the checkerboard pattern captured from various positions and angles, with detected corner points utilized for calibration. The right panel presents the calibrated checkerboard pattern, demonstrating the corresponding points and lines between two cameras, which reflect the geometric relationship and accuracy achieved after calibration. Different colored lines indicate the correspondences between points during the calibration process.

saved and the undistorted output is displayed. The visualization results of the two types of errors are shown in Figure. 2. This process ensures the accuracy of the calibration, thereby improving the measurement accuracy and stability in subsequent applications.

#### A.2.2. Camera Settings

We recorded the five real scenes using the calibration parameters obtained during the calibration process. By adjusting the indoor lighting and shooting angles, we ensured the richness of the recorded scene details. The adopted event camera has a spatial resolution of  $346 \times 260$ , a temporal resolution of  $1 \mu s$ , a typical latency of less than  $1 ms$ , a maximum throughput of 12 MEps, and a dynamic range of



Table 3. **Comparison with EvDNeRF [2] on EvDNeRF dataset and DSEC dataset.** It demonstrates the robustness of our method to different datasets.

|                    | EvDNeRF [2] dataset |              | DSEC [5] dataset |              |
|--------------------|---------------------|--------------|------------------|--------------|
| Metric             | EvDNeRF             | Ours         | EvDNeRF          | Ours         |
| PSNR $\uparrow$    | 31.75               | <b>32.84</b> | 31.89            | <b>32.08</b> |
| SSIM $\uparrow$    | 0.910               | <b>0.922</b> | 0.911            | <b>0.915</b> |
| LPIPS $\downarrow$ | 0.066               | <b>0.064</b> | 0.068            | <b>0.064</b> |

Table 4. **Comparison of the poses directly estimated from the blurry images with those estimated from the EDI-deblurred images.** Using COLMAP directly on the blurry images fails in 10 scenes and succeeds in only 9 scenes. For the successful cases, the ATE are presented below.

| ATE $\downarrow$      | Medium-scale                        | Large-scale                         |
|-----------------------|-------------------------------------|-------------------------------------|
| Poses (Blurry Images) | $0.054 \pm 0.014$                   | $0.086 \pm 0.275$                   |
| Poses (EDI-deblurred) | <b><math>0.046 \pm 0.013</math></b> | <b><math>0.049 \pm 0.011</math></b> |

approximately 120 dB (with 50% of the pixels responding to 80% contrast changes under 0.1-100k lux conditions). The contrast sensitivity is 14.3% (ON) and 22.5% (OFF) (with 50% of the pixels responding). These parameters ensure that the event camera can stably and efficiently record scene information under various lighting conditions and dynamic ranges.

### A.3. Comparison with Existing Datasets

The aim of contributing this dataset is to establish a more comprehensive evaluation benchmark for event-assisted deblurring reconstruction tasks. We observed that although E2NeRF [10] and EvDNeRF [2] have introduced similar datasets, their datasets suffer from limited scene and camera motion diversity, as well as insufficient data size. As shown in Table. 1 and Table. 2, our proposed dataset includes more diverse scenes with various scales, making it better suited for a comprehensive evaluation.

## B. Additional Ablations

### B.1. Analysis on EDI Pre-processing

In our method, we use EDI [9] to pre-process the blurry RGB images, followed by COLMAP [11] to obtain the initial point cloud for 3D-GS optimization and the initial camera poses for camera trajectory optimization. Examples of the input blurry images and the EDI pre-process results are shown in Figure. 8. It shows that the EDI-deblur process produces sharper textures and clearer geometries than the original blurry input. However, as demonstrated by the ‘EDI-GS’ results in Table.1 of the main text, directly using them to train a 3D-GS model produces suboptimal results.

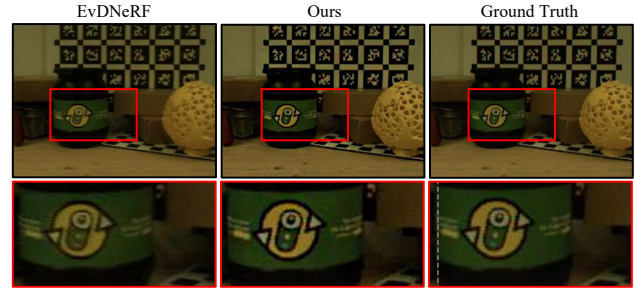

Figure 6. **Qualitative comparison with EvDNeRF [2] on the EvDNeRF dataset.** It demonstrates the robustness of our method to other datasets.

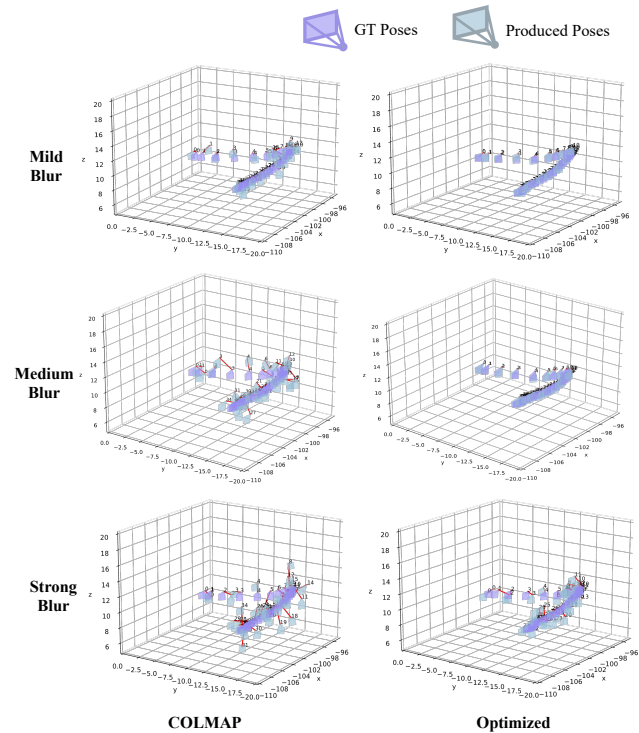

Figure 7. **Visualization of pose accuracy in different level of motion blur.** Images with mild blur are captured at 0.5 $\times$  camera motion speed, images with medium blur are captured at the default motion speed, and images with strong blur are captured at 2.0 $\times$  motion speed.

This is because the images still exhibit poor texture details, and the deblurring process introduces inconsistencies in the images. For pose estimation, we compare the poses directly estimated from the blurry images with those estimated from the EDI-deblurred images on the **EvaGaussians-synthetic** dataset, which contains 19 scenes. Using COLMAP directly on the blurry images fails in 10 scenes and succeeds in only 9 scenes. For the successful cases, we report

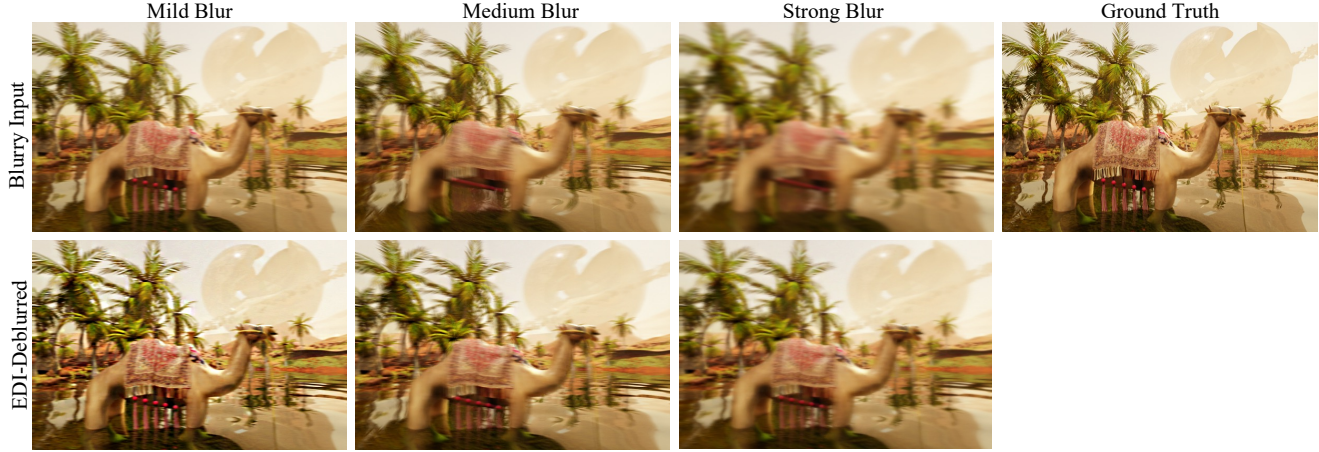

Figure 8. **Examples of blurry images and EDI pre-process results.** The EDI-deblur process produces sharper textures and clearer geometries than the original blurry input. However, as demonstrated by the ‘EDI-GS’ results in Table.1 of the main text, directly using them to train a 3D-GS model produces suboptimal results, because the images still exhibit poor texture details, and the deblurring process introduces inconsistencies in the images.

the ATE (Average Trajectory Error) on the large-scale and medium-scale scenes in Table 4.

## B.2. Robustness to Different Datasets.

To validate the robustness of our method across different datasets, we perform a novel view synthesis comparison on another two real-world datasets: 1) the dataset provided by EvDNeRF [2], denoted as EvDNeRF dataset; 2) the *interlaken-00-f* scene from the DSEC [5] driving video dataset, which contains static clips for novel view synthesis evaluation. The results are reported in Table. 3 and Figure. 6. It demonstrates the robustness of our method to different datasets.

## B.3. Robustness of Pose Optimization

We present an ablation on the robustness of pose optimization in different blur level. we set up three different camera speeds in the *City Blocks* scene of the synthetic dataset to obtain images with varying levels of blur. Images with mild blur are captured at  $0.5\times$  camera motion speed, images with medium blur are captured at the default motion speed, and images with strong blur are captured at  $2.0\times$  motion speed. We then compare the ATE (Average Trajectory Error between the initial EDI-produced COLMAP poses and the final poses optimized by our method. As shown in Figure. 7, with the motion blur becoming more severe, the accuracy of the COLMAP poses is significantly impacted, while the optimized poses maintain a higher level of accuracy. In a horizontal comparison, the optimized poses better match the ground truth across various levels of blur, demonstrating the effectiveness of pose optimization.

## C. Detailed Comparisons

### C.1. Synthetic Data Comparison

We present a detailed per-scene analysis of the novel view synthesis performance in medium and large scale scenes from the **EvaGaussians-Blender** dataset, to evaluate the effectiveness of our method across different challenging scenes.

Table. 5 shows the PSNR value of the NVS results, which demonstrates that our proposed method consistently outperforms other approaches across various scenes. The detailed metrics for SSIM and LPIPS in Table. 6 and Table. 7 further show that our model excels in maintaining structural integrity and perceptual quality in synthesized views. Specifically, in medium-scale scenes, our method exhibits robust performance, particularly in complex environments where maintaining detail and minimizing artifacts are challenging. This can be demonstrated in scenes such as *Cozyroom* and *Factory*, where our method achieves significant improvements in both PSNR and SSIM. For large-scale scenes, scenes like *Desert* and *City Blocks* highlight the model’s capability to generalize across different scales and provide high-quality novel view synthesis.

We also present more qualitative results of novel view synthesis in Figure. 11 and Figure. 12. The results highlight our model’s ability to reconstruct fine details and maintain high color accuracy beyond the comparison baselines.

### C.2. Real-world Data Comparison

In this section, we present a comprehensive per-scene analysis of novel view synthesis results on the **EvaGaussians-DAVIS** dataset. As introduced in the main text, the adopted

Table 5. **The Novel View Synthesis Results of PSNR  $\uparrow$  in the EvaGaussians-Blender Dataset.** The highest values in each category are highlighted in **bold** to indicate the best results.

| Models              | Medium       |              |              |              |              |              |              | Large        |              |              |              |              |
|---------------------|--------------|--------------|--------------|--------------|--------------|--------------|--------------|--------------|--------------|--------------|--------------|--------------|
|                     | Classroom    | Dormitory    | Café         | Pool         | Cozyroom     | Factory      | Tanabata     | Desert       | City Blocks  | London       | Forests      | Lake         |
| Blurry-NeRF         | 25.42        | 26.72        | 21.23        | 26.66        | 15.42        | 26.76        | 26.38        | 19.04        | 19.34        | 20.00        | 23.60        | 24.67        |
| Blurry-GS           | 25.59        | 26.83        | 21.34        | 26.17        | 20.76        | 26.48        | 26.46        | 19.67        | 19.48        | 20.18        | 23.75        | 24.34        |
| UFP-GS              | 28.64        | 29.68        | 21.54        | 26.79        | 21.62        | 27.60        | 28.77        | 20.78        | 20.85        | 16.61        | 22.96        | 25.60        |
| EDI-GS              | 28.49        | 29.90        | 22.62        | 26.36        | 21.17        | 29.06        | 27.46        | 20.66        | 20.68        | 20.27        | 23.97        | 25.99        |
| EFNET-GS            | 28.59        | 29.48        | 22.04        | 26.36        | 21.42        | 27.57        | 27.43        | 20.62        | 21.70        | 20.36        | 25.57        | 25.18        |
| E <sup>2</sup> NeRF | 28.87        | 30.77        | 26.16        | 28.92        | 21.23        | 29.85        | 28.65        | 20.02        | 21.78        | 21.30        | 25.90        | 25.78        |
| BAD-NeRF            | 30.28        | 31.23        | 27.18        | 28.71        | 21.68        | 30.28        | 29.85        | 21.09        | 21.91        | 22.91        | 26.35        | 26.99        |
| BAD-Gaussians       | 30.28        | 31.23        | 27.18        | 28.72        | 21.68        | 30.28        | 29.85        | 21.10        | 21.93        | 22.93        | 26.35        | 26.98        |
| BAGS                | 30.93        | 31.40        | 28.23        | 29.12        | 21.88        | 30.88        | 30.14        | 22.20        | 24.22        | 23.83        | 26.80        | 27.58        |
| EvDNeRF             | 31.83        | 28.95        | 28.66        | 29.69        | 22.01        | 31.20        | 30.02        | 21.62        | 22.23        | 23.88        | 27.10        | 28.29        |
| <b>Ours</b>         | <b>34.38</b> | <b>32.97</b> | <b>30.41</b> | <b>30.26</b> | <b>22.71</b> | <b>31.85</b> | <b>30.71</b> | <b>24.88</b> | <b>23.71</b> | <b>23.99</b> | <b>27.62</b> | <b>29.90</b> |

Table 6. **The Novel View Synthesis of SSIM  $\uparrow$  in the EvaGaussians-Blender Dataset.** The highest values in each category are highlighted in **bold** to indicate the best results.

| Models              | Medium        |               |               |               |               |               |               | Large         |               |               |               |               |
|---------------------|---------------|---------------|---------------|---------------|---------------|---------------|---------------|---------------|---------------|---------------|---------------|---------------|
|                     | Classroom     | Dormitory     | Café          | Pool          | Cozyroom      | Factory       | Tanabata      | Desert        | City Blocks   | London        | Forests       | Lake          |
| Blurry-NeRF         | 0.7086        | 0.8281        | 0.5682        | 0.7442        | 0.5098        | 0.8567        | 0.8057        | 0.6023        | 0.6325        | 0.6732        | 0.7002        | 0.7823        |
| Blurry-GS           | 0.7154        | 0.8312        | 0.5638        | 0.7265        | 0.7632        | 0.8519        | 0.8064        | 0.6386        | 0.6341        | 0.6819        | 0.7026        | 0.7807        |
| UFP-GS              | 0.8701        | 0.9281        | 0.5706        | 0.7527        | 0.7729        | 0.8640        | 0.8569        | 0.6172        | 0.6144        | 0.5807        | 0.6911        | 0.7968        |
| EDI-GS              | 0.8456        | 0.9291        | 0.5977        | 0.7288        | 0.7703        | 0.8963        | 0.8408        | 0.6567        | 0.5655        | 0.6882        | 0.7158        | 0.8012        |
| EFNET-GS            | 0.8692        | 0.9259        | 0.5841        | 0.7288        | 0.7797        | 0.8643        | 0.8345        | 0.6164        | 0.6366        | 0.6069        | 0.7628        | 0.7901        |
| E <sup>2</sup> NeRF | 0.8723        | 0.9319        | 0.7869        | 0.8795        | 0.7724        | 0.9245        | 0.8915        | 0.6169        | 0.6822        | 0.6734        | 0.7467        | 0.8139        |
| BAD-NeRF            | 0.8978        | 0.9337        | 0.8041        | 0.8794        | 0.7764        | 0.9353        | 0.9271        | 0.6314        | 0.6867        | 0.6932        | 0.7583        | 0.8919        |
| BAD-Gaussians       | 0.8992        | 0.9351        | 0.8031        | 0.8781        | 0.7755        | 0.9345        | 0.9266        | 0.6346        | 0.6851        | 0.6944        | 0.7578        | 0.8908        |
| BAGS                | 0.9162        | 0.9471        | 0.8191        | 0.8931        | 0.7925        | 0.9465        | 0.9446        | 0.6496        | 0.7011        | 0.7074        | 0.7758        | 0.9048        |
| EvDNeRF             | 0.9023        | 0.8935        | 0.8513        | 0.8885        | 0.7854        | 0.9454        | 0.9311        | 0.6589        | 0.7023        | <b>0.7159</b> | 0.7726        | 0.9129        |
| <b>Ours</b>         | <b>0.9402</b> | <b>0.9580</b> | <b>0.9033</b> | <b>0.9108</b> | <b>0.8052</b> | <b>0.9592</b> | <b>0.9382</b> | <b>0.8152</b> | <b>0.7405</b> | 0.7145        | <b>0.8152</b> | <b>0.9465</b> |

metrics include BRISQUE, NIQE, PIQE, MetaIQA, and RankIQA, which can effectively assess the quality of synthesized views in a no-reference manner. As shown in Table. 8, our model achieves the best BRISQUE scores across all scenes, highlighting its ability to produce visually appealing and less distorted images. For NIQE, as presented in Table. 9, our approach significantly outperforms the baselines, achieving the lowest average NIQE score. This demonstrates our method’s robustness in generating high-quality images with minimal perceptual artifacts. In terms of PIQE, Table. 10 shows that our model again leads in performance, achieving the lowest PIQE scores, which underscores the effectiveness of our model in preserving image details and reducing noise. Furthermore, our method excels in MetaIQA and RankIQA evaluations, as detailed in Tables. 11 and Table. 12, respectively. The highest MetaIQA

scores and lowest RankIQA scores across most scenes affirm the overall better visual quality and fidelity of our synthesized views compared to baseline models. Overall, these results demonstrate the robustness of our method, particularly in handling complex scenes and maintaining high visual quality across diverse scenarios.

## D. Broader Impacts

Our proposed **EvaGaussians** leverages event cameras to assist novel view synthesis from low-quality, blurred images. It has the potential to bring about both positive and negative societal impacts.

On the positive side, our method can improve the efficiency of surveillance systems by reconstructing clear 3D images from low-quality footage, enabling better identification of individuals and objects in challenging conditions.



Table 7. **The Novel View Synthesis of LPIPS ↓ in the EvaGaussians-Blender Dataset.** The highest values in each category are highlighted in **bold** to indicate the best results.

| Models              | Medium        |               |               |               |               |               |               | Large         |               |               |               |               |
|---------------------|---------------|---------------|---------------|---------------|---------------|---------------|---------------|---------------|---------------|---------------|---------------|---------------|
|                     | Classroom     | Dormitory     | Café          | Pool          | Cozyroom      | Factory       | Tanabata      | Desert        | City Blocks   | London        | Forests       | Lake          |
| Blurry-NeRF         | 0.3987        | 0.2998        | 0.4528        | 0.3848        | 0.5545        | 0.2063        | 0.2348        | 0.4447        | 0.5273        | 0.3971        | 0.3425        | 0.4127        |
| Blurry-GS           | 0.3824        | 0.2873        | 0.4554        | 0.4198        | 0.2432        | 0.2091        | 0.2335        | 0.4231        | 0.4116        | 0.3925        | 0.3379        | 0.4206        |
| UFP-GS              | 0.2838        | 0.1361        | 0.4511        | 0.3646        | 0.2331        | 0.1928        | 0.1856        | 0.3816        | 0.3342        | 0.4069        | 0.3383        | 0.4069        |
| EDI-GS              | 0.2914        | 0.1267        | 0.4038        | 0.4102        | 0.2388        | 0.1446        | 0.1911        | 0.4062        | 0.3857        | 0.3901        | 0.3295        | 0.4001        |
| EFNET-GS            | 0.2846        | 0.1373        | 0.4529        | 0.4102        | 0.2345        | 0.1926        | 0.1958        | 0.3912        | 0.3222        | 0.3932        | 0.2962        | 0.4128        |
| E <sup>2</sup> NeRF | 0.2821        | 0.1165        | 0.2871        | 0.2048        | 0.2369        | 0.1073        | 0.1546        | 0.3938        | 0.3713        | 0.3928        | 0.3589        | 0.3588        |
| BAD-NeRF            | 0.2365        | 0.1083        | 0.2715        | 0.2103        | 0.2278        | 0.0992        | 0.1224        | 0.3947        | 0.3618        | 0.3224        | 0.3467        | 0.3142        |
| BAD-Gaussians       | 0.2384        | 0.1078        | 0.2695        | 0.2094        | 0.2262        | 0.0985        | 0.1215        | 0.3965        | 0.3604        | 0.3215        | 0.3452        | 0.3129        |
| BAGS                | 0.2334        | 0.1076        | 0.2495        | 0.1994        | 0.2112        | 0.0985        | 0.1201        | 0.3765        | 0.3354        | 0.3015        | 0.3252        | 0.2979        |
| EvDNeRF             | 0.2217        | 0.1455        | 0.2447        | 0.1926        | 0.1942        | 0.0768        | 0.1086        | 0.3823        | 0.3497        | <b>0.2972</b> | 0.3163        | 0.2941        |
| <b>Ours</b>         | <b>0.1927</b> | <b>0.0928</b> | <b>0.2311</b> | <b>0.1859</b> | <b>0.1873</b> | <b>0.0715</b> | <b>0.1023</b> | <b>0.2053</b> | <b>0.2835</b> | 0.2983        | <b>0.2857</b> | <b>0.2674</b> |

Table 8. **The Novel View Synthesis of BRISQUE ↓ in the EvaGaussians-DAVIS Dataset.** The highest values in each category are highlighted in **bold** to indicate the best results.

| Models              | BRISQUE ↓      |                |                |                |                |                |
|---------------------|----------------|----------------|----------------|----------------|----------------|----------------|
|                     | Desk & Chair   | Washroom       | Pokémon        | Pillow         | Bag            | Average        |
| B-NeRF              | 63.9428        | 102.7828       | 109.2711       | 97.4778        | 87.7699        | 92.2489        |
| B-3DGS              | 51.1542        | 82.2262        | 87.4169        | 77.9823        | 70.2159        | 73.7991        |
| UFP-GS              | 43.6932        | 69.7354        | 74.6684        | 66.6098        | 59.9711        | 62.9356        |
| EDI-GS              | 43.4811        | 69.9923        | 74.3044        | 66.2849        | 59.6835        | 62.7492        |
| EFN-GS              | 43.5235        | 69.8473        | 74.2875        | 66.3158        | 59.6523        | 62.7253        |
| E <sup>2</sup> NeRF | 36.2148        | 64.4332        | 77.0112        | 67.1324        | 62.8063        | 61.5196        |
| BAD-NeRF            | 42.6285        | 68.5219        | 72.8474        | 64.9852        | 58.5133        | 61.4993        |
| BAD-GS              | 42.2065        | 67.8434        | 72.1261        | 64.3418        | 57.9339        | 60.8903        |
| BAGS                | 36.8725        | 61.4523        | 71.3098        | 62.8746        | 60.3951        | 58.5809        |
| EvDNeRF             | 34.5687        | 61.5044        | 73.5012        | 64.0809        | 59.4969        | 58.6304        |
| <b>Ours</b>         | <b>32.9225</b> | <b>56.5756</b> | <b>70.0211</b> | <b>61.0294</b> | <b>58.1876</b> | <b>53.9623</b> |

This can bolster public safety and aid in criminal investigations. Additionally, the ability to reconstruct scenes from blurred inputs can enhance the performance of autonomous vehicles, drones, and robots, enabling them to navigate more accurately in poor visibility conditions, leading to safer and more efficient transportation and logistics. In situations where traditional cameras may struggle to capture clear images under extreme conditions, our method can provide valuable information for first responders and rescue teams, helping them make informed decisions and potentially saving lives. Furthermore, our technique can be applied to medical imaging, allowing for better visualization of internal structures and more accurate diagnoses, ultimately leading to improved patient outcomes.

On the negative side, the enhanced surveillance capabilities enabled by our method may raise privacy concerns. For example, our method could be used for malicious purposes,

such as stalking or spying on individuals without their consent. It is important to establish regulations and guidelines to prevent such misuse.

Table 9. The Novel View Synthesis of NIQE in the EvaGaussians-DAVIS Dataset.

| Models              | NIQE ↓        |               |                |               |               |               |
|---------------------|---------------|---------------|----------------|---------------|---------------|---------------|
|                     | Desk & Chair  | Washroom      | Pokémon        | Pillow        | Bag           | Average       |
| B-NeRF              | 11.4380       | 15.5386       | 16.9153        | 16.2316       | 14.8844       | 15.0016       |
| B-3DGS              | 9.1504        | 12.4309       | 13.5323        | 12.9853       | 11.9075       | 12.0113       |
| UFP-GS              | 7.7736        | 10.6170       | 11.3827        | 10.9266       | 10.1715       | 10.1743       |
| EDI-GS              | 7.7778        | 10.5662       | 11.5024        | 11.0375       | 10.1214       | 10.2011       |
| EFN-GS              | 7.8235        | 10.5412       | 11.4868        | 11.0743       | 10.1288       | 10.2109       |
| E <sup>2</sup> NeRF | 6.8907        | 9.0924        | 11.6383        | 10.1830       | 9.3954        | 9.4400        |
| BAD-NeRF            | 7.6253        | 10.3590       | 11.2769        | 10.8211       | 9.9229        | 10.0011       |
| BAD-GS              | 7.5498        | 10.2565       | 11.1652        | 10.7139       | 9.8247        | 9.9020        |
| BAGS                | 7.0145        | 9.0372        | 11.2487        | 9.8124        | 9.3176        | 9.2860        |
| EvDNeRF             | 6.5775        | 8.6791        | 11.1092        | 9.7201        | 8.9684        | 9.0109        |
| <b>Ours</b>         | <b>6.1898</b> | <b>8.1117</b> | <b>10.2662</b> | <b>8.9455</b> | <b>8.3421</b> | <b>8.3711</b> |

Table 10. The Novel View Synthesis of PIQE in the EvaGaussians-DAVIS Dataset.

| Models              | PIQE ↓         |                |                |                |                |                |
|---------------------|----------------|----------------|----------------|----------------|----------------|----------------|
|                     | Desk & Chair   | Washroom       | Pokémon        | Pillow         | Bag            | Average        |
| B-NeRF              | 58.4566        | 68.8701        | 73.4701        | 54.0862        | 74.7257        | 65.9217        |
| B-3DGS              | 46.7653        | 55.0961        | 58.7761        | 43.2689        | 59.7806        | 52.7374        |
| UFP-GS              | 39.9453        | 47.0612        | 50.2026        | 36.9659        | 50.9631        | 45.0276        |
| EDI-GS              | 39.7505        | 46.8317        | 49.9597        | 36.7786        | 50.8135        | 44.8268        |
| EFN-GS              | 39.7748        | 46.7951        | 49.9346        | 36.7891        | 50.8275        | 44.8242        |
| E <sup>2</sup> NeRF | 40.9825        | 49.2988        | 50.4868        | 39.7896        | 53.2203        | 46.7556        |
| BAD-NeRF            | 38.9711        | 45.9134        | 48.9801        | 36.0574        | 49.8171        | 43.9478        |
| BAD-GS              | 38.5852        | 45.4588        | 48.4951        | 35.7004        | 49.3239        | 43.5127        |
| BAGS                | 38.5789        | 45.9635        | 46.5281        | 46.5281        | 48.7834        | 45.2744        |
| EvDNeRF             | 39.1197        | 47.0580        | 48.1919        | 37.9810        | 50.8012        | 44.6304        |
| <b>Ours</b>         | <b>36.5717</b> | <b>44.3304</b> | <b>44.0641</b> | <b>35.3059</b> | <b>47.3749</b> | <b>41.5294</b> |

Table 11. The Novel View Synthesis of MetaIQA in the EvaGaussians-DAVIS Dataset.

| Models              | MetaIQA ↑     |               |               |               |               |               |
|---------------------|---------------|---------------|---------------|---------------|---------------|---------------|
|                     | Desk & Chair  | Washroom      | Pokémon       | Pillow        | Bag           | Average       |
| B-NeRF              | 0.1419        | 0.1272        | 0.1085        | 0.1122        | 0.1307        | 0.1241        |
| B-3DGS              | 0.1621        | 0.1454        | 0.1240        | 0.1283        | 0.1494        | 0.1418        |
| UFP-GS              | 0.1976        | 0.1774        | 0.1521        | 0.1564        | 0.1823        | 0.1732        |
| EDI-GS              | 0.1986        | 0.1780        | 0.1518        | 0.1571        | 0.1830        | 0.1737        |
| EFN-GS              | 0.1928        | 0.1835        | 0.1579        | 0.1643        | 0.1799        | 0.1757        |
| E <sup>2</sup> NeRF | 0.1959        | 0.2020        | 0.1619        | 0.1723        | 0.1722        | 0.1809        |
| BAD-NeRF            | 0.2027        | 0.1817        | 0.1549        | 0.1603        | 0.1867        | 0.1773        |
| BAD-GS              | 0.2047        | 0.1835        | 0.1565        | 0.1620        | 0.1886        | 0.1790        |
| BAGS                | 0.1987        | 0.2036        | 0.1819        | 0.2024        | 0.2012        | 0.1978        |
| EvDNeRF             | 0.2067        | 0.2132        | 0.1709        | 0.1819        | 0.1817        | 0.1909        |
| <b>Ours</b>         | <b>0.2135</b> | <b>0.2188</b> | <b>0.1975</b> | <b>0.2188</b> | <b>0.2160</b> | <b>0.2129</b> |

Table 12. The **Novel View Synthesis** of RankIQa in the **EvaGaussians-DAVIS** Dataset.

| Models              | RankIQa ↓     |               |               |               |               |               |
|---------------------|---------------|---------------|---------------|---------------|---------------|---------------|
|                     | Desk & Chair  | Washroom      | Pokémon       | Pillow        | Bag           | Average       |
| B-NeRF              | 7.4896        | 10.4454       | 10.7921       | 9.6578        | 8.7541        | 9.4278        |
| B-3DGS              | 5.9917        | 8.3563        | 8.6337        | 7.7262        | 7.0032        | 7.5422        |
| UFP-GS              | 5.1153        | 7.1215        | 7.3741        | 6.6005        | 5.9829        | 6.4389        |
| EDI-GS              | 5.0929        | 7.1029        | 7.3386        | 6.5673        | 5.9528        | 6.4109        |
| EFN-GS              | 5.1046        | 7.0893        | 7.3158        | 6.5789        | 5.9682        | 6.4114        |
| E <sup>2</sup> NeRF | 4.5141        | 6.4997        | 5.7764        | 5.7600        | 5.3166        | 5.5733        |
| BAD-NeRF            | 4.9931        | 6.9636        | 7.1948        | 6.4385        | 5.8360        | 6.2852        |
| BAD-GS              | 4.9436        | 6.8947        | 7.1235        | 6.3748        | 5.7783        | 6.2230        |
| BAGS                | 4.6583        | 6.3721        | 5.8742        | 6.0157        | 5.2840        | 5.6410        |
| EvDNeRF             | 4.3089        | 6.2043        | 5.5138        | 5.4981        | 5.0749        | 5.3200        |
| <b>Ours</b>         | <b>3.9369</b> | <b>5.6564</b> | <b>5.0867</b> | <b>5.1538</b> | <b>4.6422</b> | <b>4.8952</b> |



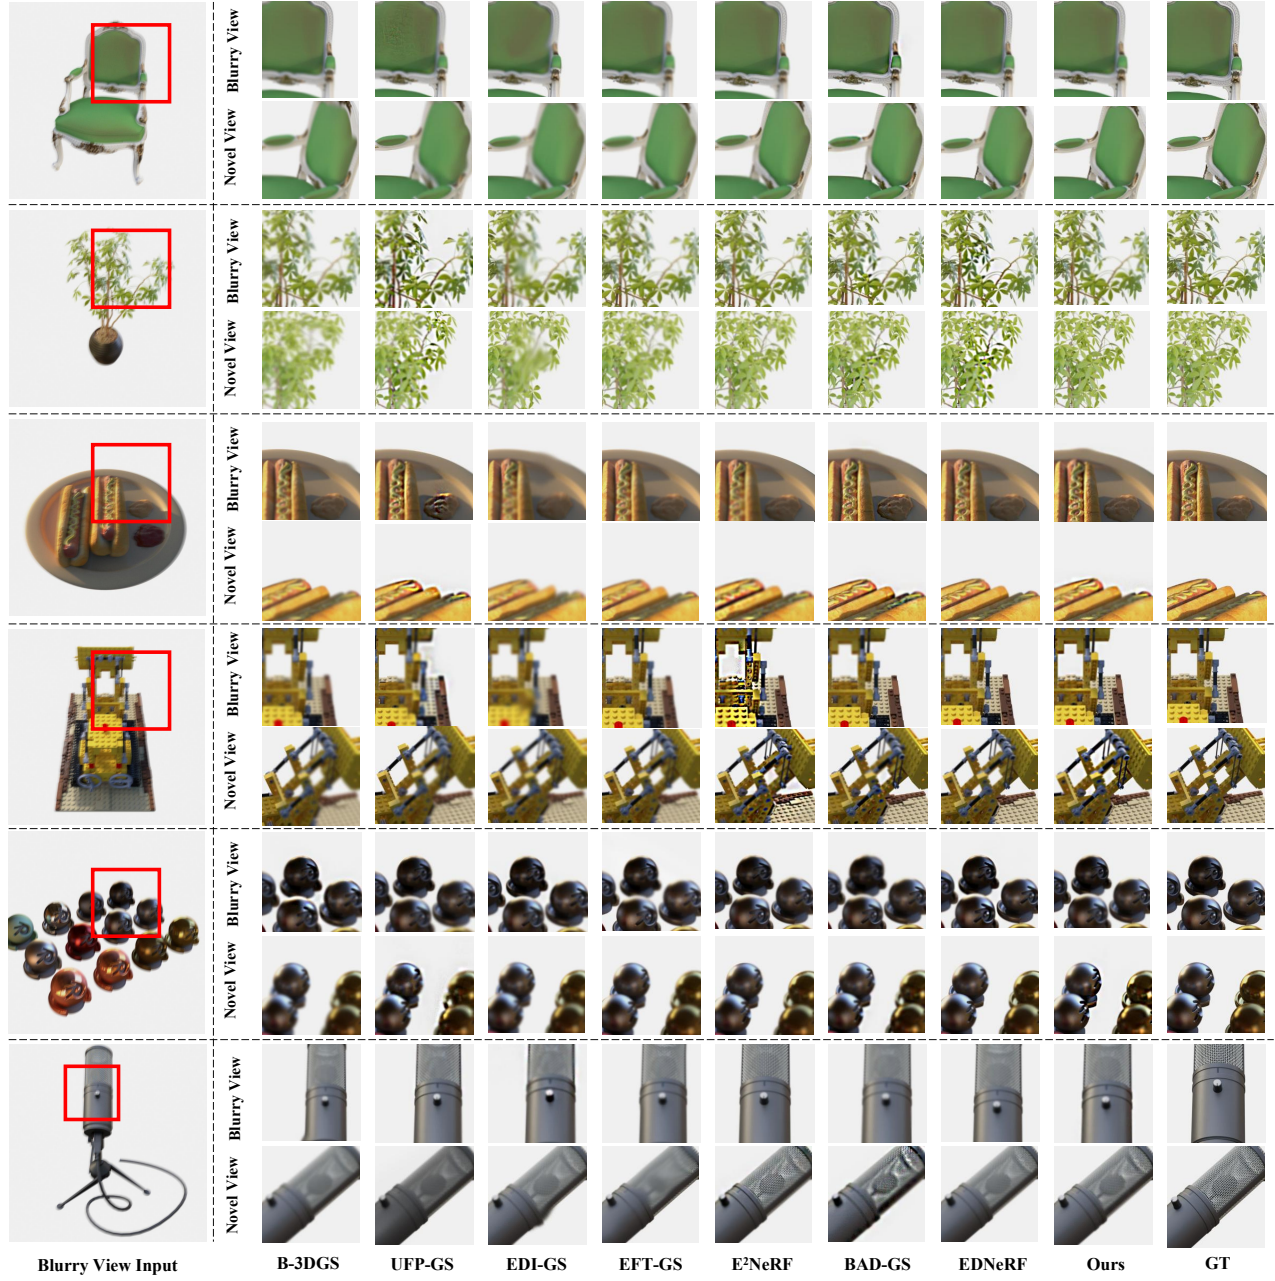

Figure 9. **Visualization of deblurring results and NVS results.** The deblurring results are highlighted in the red bounding box. The results demonstrate that our method consistently excels in reconstructing fine details and maintaining high color accuracy compared to the baselines.

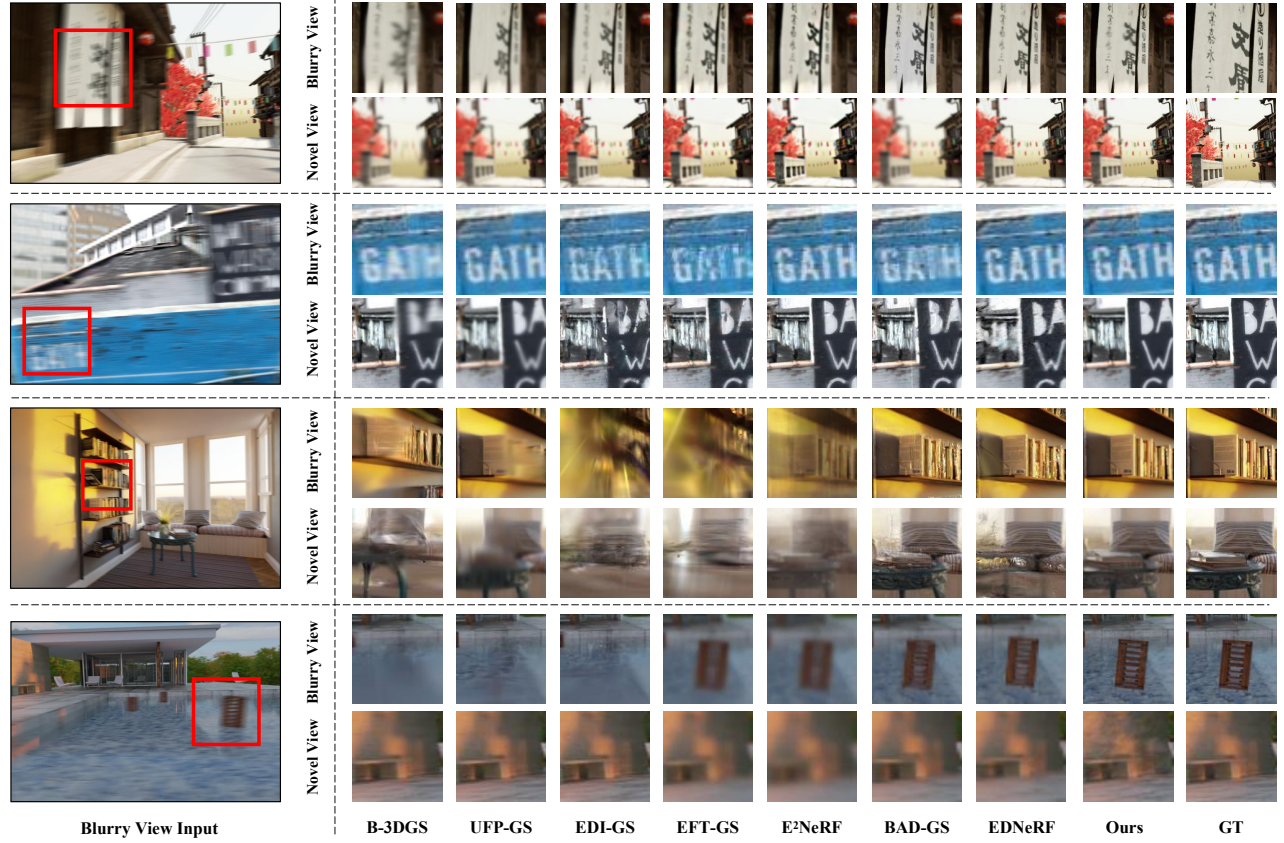

Figure 10. **Visualization of deblurring results and NVS results.** The deblurring results are highlighted in the red bounding box. The results demonstrate that our method consistently excels in reconstructing fine details and maintaining high color accuracy compared to the baselines.



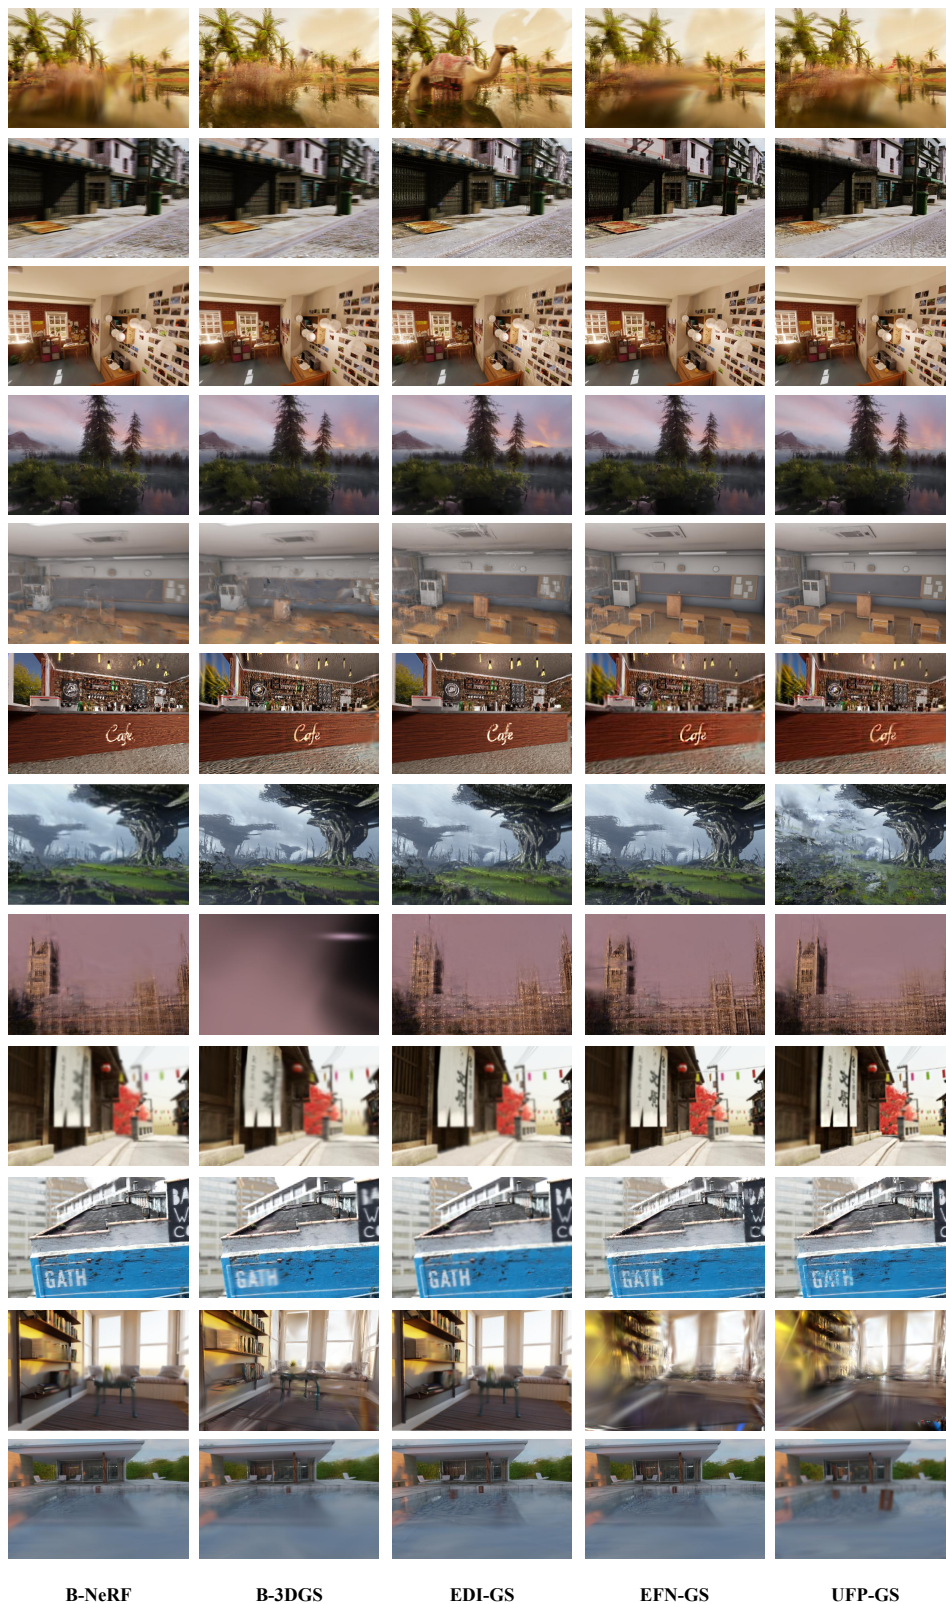

Figure 11. **Visualization of Novel View Synthesis.** We show results of B-NeRF, B-3DGS, EDI-GS [9], EFN-GS [12] and UFP-GS [4] in the EvaGaussians-Blender Dataset.



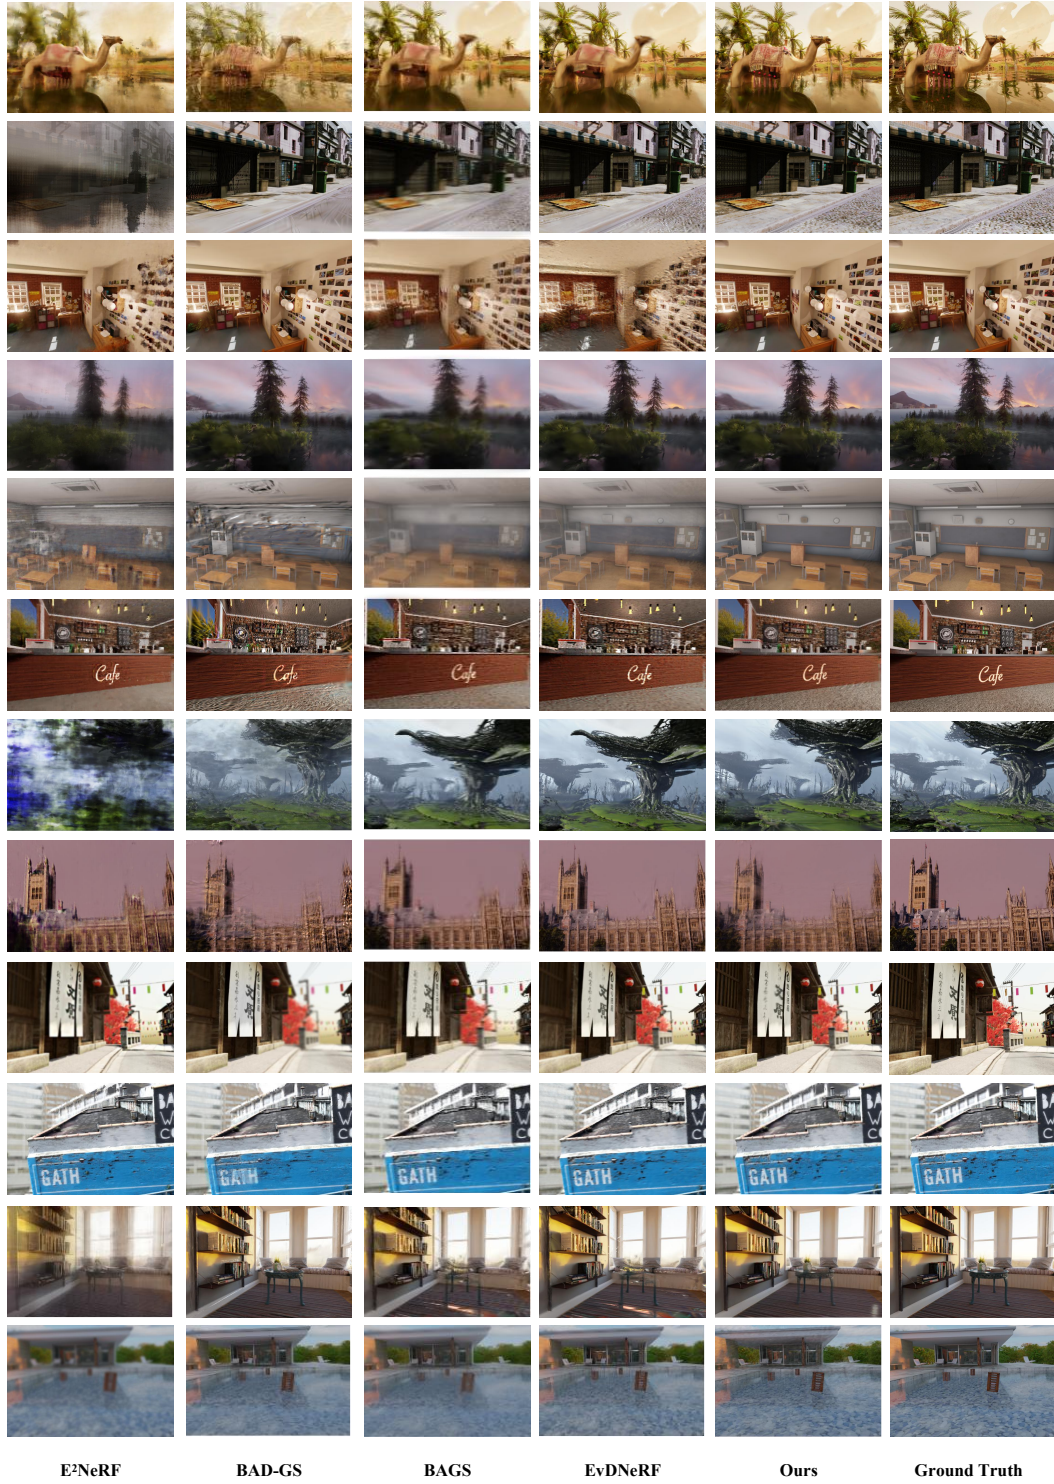

Figure 12. **Visualization of Novel View Synthesis.** We show results of E<sup>2</sup>NeRF [10], BAD-GS [13], BAGS [13], EvDNeRF [2] and Ours in the EvaGaussian-Blender Dataset.

## References

- [1] Christian Brandli, Lorenz Muller, and Tobi Delbruck. Real-time, high-speed video decompression using a frame- and event-based davis sensor. In *2014 IEEE International Symposium on Circuits and Systems (ISCAS)*, pages 686–689, 2014. 2
- [2] Marco Cannici and Davide Scaramuzza. Mitigating motion blur in neural radiance fields with events and frames. In *Proceedings of the IEEE/CVF Conference on Computer Vision and Pattern Recognition (CVPR)*, 2024. 2, 5, 6, 14
- [3] Blender Online Community. *Blender - a 3D modelling and rendering package*. Blender Foundation, Stichting Blender Foundation, Amsterdam, 2018. 1, 4
- [4] Zhenxuan Fang, Fangfang Wu, Weisheng Dong, Xin Li, Jinjian Wu, and Guangming Shi. Self-supervised non-uniform kernel estimation with flow-based motion prior for blind image deblurring. In *Proceedings of the IEEE/CVF Conference on Computer Vision and Pattern Recognition*, pages 18105–18114, 2023. 13
- [5] Mathias Gehrig, Mario Millhäusler, Daniel Gehrig, and Davide Scaramuzza. E-raft: Dense optical flow from event cameras. In *International Conference on 3D Vision (3DV)*, 2021. 5, 6
- [6] Yuhuang Hu, Shih-Chii Liu, and Tobi Delbruck. v2e: From video frames to realistic dvs events. In *Proceedings of the IEEE/CVF Conference on Computer Vision and Pattern Recognition*, pages 1312–1321, 2021. 1
- [7] Li Ma, Xiaoyu Li, Jing Liao, Qi Zhang, Xuan Wang, Jue Wang, and Pedro V Sander. Deblur-NeRF: Neural Radiance Fields from Blurry Images. In *CVPR*, 2022. 1
- [8] Ben Mildenhall, Pratul P Srinivasan, Matthew Tancik, Jonathan T Barron, Ravi Ramamoorthi, and Ren Ng. NeRF: Representing Scenes as Neural Radiance Fields for View Synthesis. In *ECCV*, 2020. 1
- [9] Liyuan Pan, Cedric Scheerlinck, Xin Yu, Richard Hartley, Miaomiao Liu, and Yuchao Dai. Bringing a blurry frame alive at high frame-rate with an event camera. In *CVPR*, 2019. 5, 13
- [10] Yunshan Qi, Lin Zhu, Yu Zhang, and Jia Li. E2nerf: Event enhanced neural radiance fields from blurry images. In *ICCV*, 2023. 2, 5, 14
- [11] Johannes L Schonberger and Jan-Michael Frahm. Structure-from-motion Revisited. In *CVPR*, 2016. 5
- [12] Lei Sun, Christos Sakaridis, Jingyun Liang, Qi Jiang, Kailun Yang, Peng Sun, Yaozu Ye, Kaiwei Wang, and Luc Van Gool. Event-based fusion for motion deblurring with cross-modal attention. In *European Conference on Computer Vision*, pages 412–428. Springer, 2022. 13
- [13] Lingzhe Zhao, Peng Wang, and Peidong Liu. Bad-gaussians: Bundle adjusted deblur gaussian splatting. In *ECCV*, 2024. 14
